# Supplementary material for: Performance enhancement of poly(3-hexylthiophene-2,5-diyl) based field effect transistors through surfactant treatment of the poly(vinyl alcohol) gate insulator surface
Source: Royal Society of Chemistry journal article supplement (doi:10.1039/c4cp02245a), 2014-08-04
Supplement: c4cp02245a1.pdf [file c4cp02245a1.pdf]

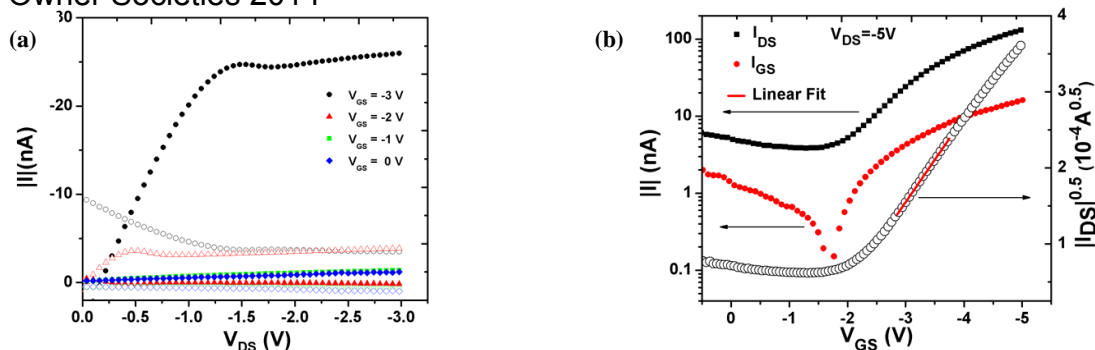

Figure S1: (a) Output characteristics ( $I_{DS} \times V_{DS}$ ) of the transistor with untreated cr-PVA layer. Open symbols correspond to leakage current ( $I_{GS}$ ), whereas solid symbols represent channel current ( $I_{DS}$ ); (b) transfer characteristics of the same device.

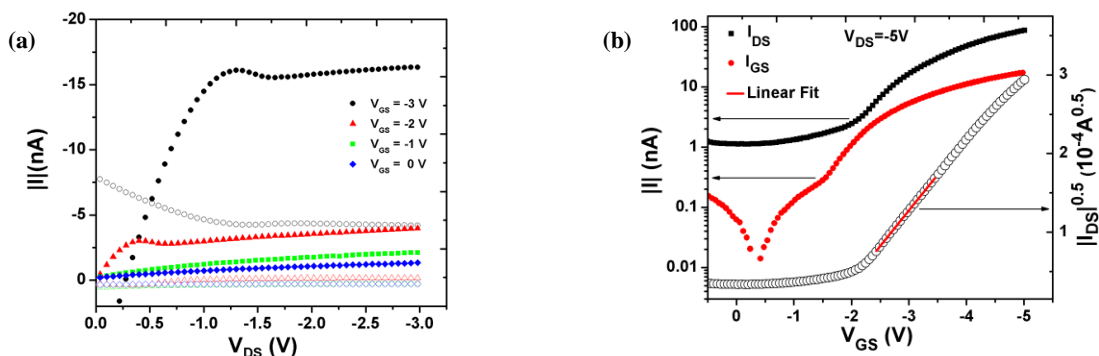

Figure S2: (a) Output characteristics ( $I_{DS} \times V_{DS}$ ) of the transistor in which the cr-PVA layer was treated with 0.3 mg/mL of CTAB solution. Open symbols correspond to leakage current ( $I_{GS}$ ), whereas solid symbols represent channel current ( $I_{DS}$ ); (b) transfer characteristics of the same device.

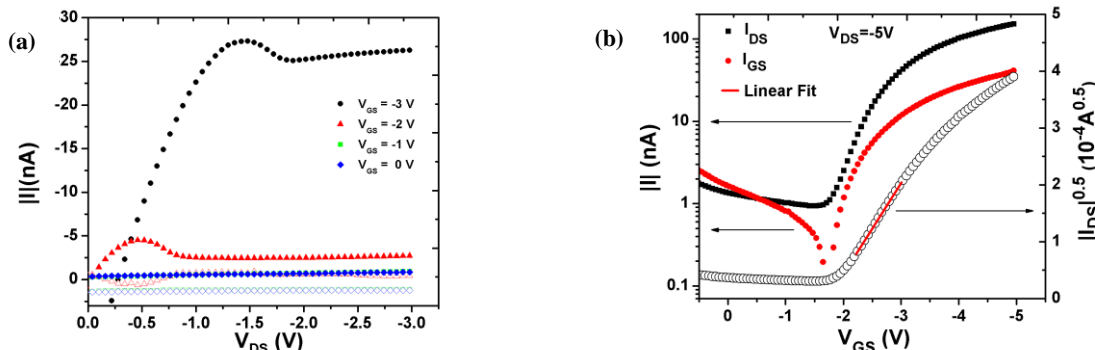

Figure S3: (a) Output characteristics ( $I_{DS} \times V_{DS}$ ) of the transistor in which the cr-PVA layer was treated with 0.5 mg/mL of CTAB solution. Open symbols correspond to leakage current ( $I_{GS}$ ), whereas solid symbols represent channel current ( $I_{DS}$ ); (b) transfer characteristics of the same device.

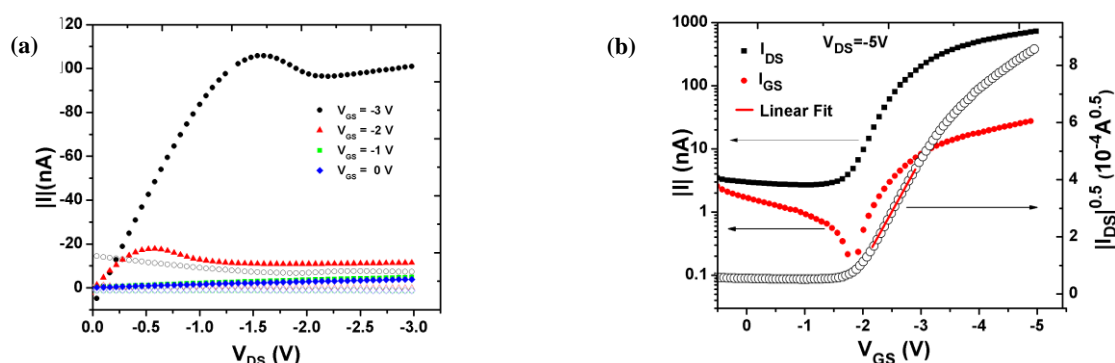

Figure S4: (a) Output characteristics ( $I_{DS} \times V_{DS}$ ) of the transistor in which the cr-PVA layer was treated with 3.0 mg/mL of CTAB solution. Open symbols correspond to leakage current ( $I_{GS}$ ), whereas solid symbols represent channel current ( $I_{DS}$ ); (b) transfer characteristics of the same device.
